# Supplementary material for: Binding of Helicobacter pylori to Human Gastric Mucins Correlates with Binding of TFF1
Source: PubMed Central journal article supplement (PMC6027488; doi:10.3390/microorganisms6020044), 2018-05-18
Supplement: microorganisms-06-00044-s001.pdf [file microorganisms-06-00044-s001.pdf]

## Supplementary Information

Binding of *Helicobacter pylori* to Human Gastric Mucins Correlates with Binding of TFF1

### Table of contents

|                                                                                                                                                               |     |
|---------------------------------------------------------------------------------------------------------------------------------------------------------------|-----|
| <b>Table S1.</b> Blood group status of individuals from whom gastric mucus was obtained for mucin purification                                                | S-2 |
| <b>Table S2.</b> Print list for the animal gastrointestinal mucin microarrays                                                                                 | S-3 |
| <b>Table S3.</b> Print list for the human colonic and gastric mucin microarrays                                                                               | S-4 |
| <b>Table S4.</b> Lectins used to characterise the glycosylation of gastric and colonic mucins, their binding specificity and the concentrations used (mg/mL). | S-5 |

**Supplementary Table S1.** Blood group status of individuals from whom gastric mucus was obtained for mucin purification.

| Gastric mucin | Blood group of donor     |
|---------------|--------------------------|
| GM1           | OLe <sup>b</sup>         |
| GM2           | ALe <sup>b</sup>         |
| GM3           | OLe <sup>b</sup>         |
| GM4           | BLe <sup>a</sup>         |
| GM5           | OLe <sup>a</sup>         |
| GM6           | OLe <sup>b</sup>         |
| GM7           | ND                       |
| GM8           | OLe <sup>a-</sup>        |
| GM9           | ALe <sup>a</sup>         |
| GM10          | ALe <sup>b</sup>         |
| GM11          | OLe <sup>a-</sup>        |
| GM12          | OLe <sup>d</sup> (a-,b-) |

ND = not determined

**Supplementary Table S2.** Print list for the animal gastrointestinal mucin microarrays. Purified mucins were printed at various concentrations (mg/mL) in PBS supplemented with various concentrations of Tween 20 (%T). Different colours indicate same species.

| Row | Number  | Source                              | Concentration | Print buffer |
|-----|---------|-------------------------------------|---------------|--------------|
| 1   | 6       | Equine Stomach 6                    | 0.25          | PBS 0.01% T  |
| 2   | 10      | Ovine Abomasum Antrum 10            | 0.1           | PBS 0.01% T  |
| 3   | 11      | E12                                 | 0.5           | PBS 0.025% T |
| 4   | 12      | Ovine Descending Colon 12           | 0.15          | PBS 0.01% T  |
| 5   | 13      | Ovine Ileum 13                      | 0.15          | PBS 0.01% T  |
| 6   | 18      | Ovine Spiral Colon 18               | 0.5           | PBS          |
| 7   | 71      | Chicken Proximal Small Intestine 34 | 0.25          | PBS          |
| 8   | 35      | Ovine Jejunum 35                    | 0.5           | PBS 0.01% T  |
| 9   | 36      | Ovine Duodenum 36                   | 0.15          | PBS 0.01% T  |
| 10  | 37      | Porcine Gastric Mucin 37            | 0.33          | PBS 0.01% T  |
| 11  | 41      | Chicken Large Intestine 41          | 0.2           | PBS 0.01% T  |
| 12  | 52      | Equine Duodenum 52                  | 0.3           | PBS 0.01% T  |
| 13  | 55      | Deer Jejunum 55                     | 0.25          | PBS 0.025% T |
| 14  | 56      | Deer Large Intestine 56             | 0.75          | PBS 0.025% T |
| 15  | 57      | Bovine Abomasum 57                  | 0.25          | PBS 0.01% T  |
| 16  | 58      | Bovine Duodenum 58                  | 0.5           | PBS 0.01% T  |
| 17  | 59      | Equine Small Intestine 59           | 0.25          | PBS          |
| 18  | 60      | Equine Left Ventral Colon 60        | 0.25          | PBS 0.01% T  |
| 19  | 61      | Bovine Spiral Colon 61              | 0.25          | PBS 0.01% T  |
| 20  | 62      | Deer Duodenum 62                    | 0.5           | PBS 0.025% T |
| 21  | 65      | Equine Right Ventral Colon 65       | 0.15          | PBS 0.01% T  |
| 22  | 66      | Equine Dorsal Colon 66              | 0.25          | PBS 0.01% T  |
| 23  | 67      | Deer Abomasum 67                    | 0.25          | PBS 0.01% T  |
| 24  | 70      | Chicken Cecum 70                    | 0.5           | PBS 0.01% T  |
| 25  | 204     | LS174T 72                           | 0.5           | PBS 0.01% T  |
| 26  | 85      | Porcine descending colon            | 0.5           | PBS 0.025% T |
| 27  | 85      | Porcine descending colon            | 0.6           | PBS 0.025% T |
| 28  | 86      | Porcine jejunum                     | 0.25          | PBS          |
| 29  | 87      | Porcine spiral colon                | 0.5           | PBS 0.025% T |
| 30  | 87      | Porcine spiral colon                | 0.6           | PBS 0.025% T |
| 31  | 102     | Porcine stomach                     | 0.5           | PBS 0.025% T |
| 32  | 103     | Porcine ceca                        | 0.5           | PBS 0.025% T |
| 33  | 105     | Mouse large intestine               | 0.4           | PBS 0.025% T |
| 34  | 106     | Mouse cecum                         | 0.3           | PBS 0.025% T |
| 35  | 107     | Mouse stomach                       | 0.5           | PBS 0.025% T |
| 36  | 121     | Mouse small intestine               | 0.25          | PBS 0.025% T |
| 37  | 139     | Rat ileum                           | 0.5           | PBS 0.025% T |
| 38  | 140     | Rat duodenum                        | 0.5           | PBS 0.025% T |
| 39  | 141     | Rat cecum                           | 0.5           | PBS 0.025% T |
| 40  | 146     | Rat stomach                         | 0.5           | PBS 0.025% T |
| 41  | 147     | Rat colon                           | 0.75          | PBS 0.01% T  |
| 42  | ASF     | Asialofetuin                        | 0.5           | PBS          |
| 43  | RB      | RNase B                             | 0.5           | PBS          |
| 44  | Fetuin  | Fetuin                              | 0.5           | PBS          |
| 45  | Xferrin | Transferrin                         | 0.5           | PBS          |
| 46  | Ovomuc  | Ovomucoid                           | 0.5           | PBS          |
| 47  | PBS     | PBS                                 |               |              |
| 48  | PBST    | PBS 0.025% Tween 20                 |               |              |

**Supplementary Table S3.** Print list for the human colonic and gastric mucin microarrays. Purified mucins were printed at various concentrations (mg/mL) in PBS supplemented with 0.01 to 0.025% Tween 20 (%T).

| Row | Code                                 | Sample                              | Print buffer | Conc |
|-----|--------------------------------------|-------------------------------------|--------------|------|
| 1   | Muc1_0.5                             | Muc1                                | PBS 0.025% T | 0.5  |
| 2   | Muc2_0.5                             | Muc2                                | PBS 0.025% T | 0.5  |
| 3   | Muc3_0.5                             | Muc3                                | PBS 0.025% T | 0.5  |
| 4   | Muc4_0.5                             | Muc4                                | PBS 0.01%T   | 0.5  |
| 5   | Muc5_0.5                             | Muc5                                | PBS 0.025% T | 0.5  |
| 6   | Muc6_0.5                             | Muc6                                | PBS 0.025% T | 0.5  |
| 7   | Muc7_0.5                             | Muc7                                | PBS 0.01%T   | 0.5  |
| 8   | Muc9_0.5                             | Muc9                                | PBS 0.01%T   | 0.5  |
| 9   | PBS_0.01%T                           |                                     | PBS 0.01%T   |      |
| 10  | GM1                                  | Gastric mucin 2                     | PBS          | 0.5  |
| 11  | GM2                                  | Gastric mucin 4                     | PBS 0.025% T | 0.5  |
| 12  | GM3                                  | Gastric mucin 11                    | PBS 0.01%T   | 0.5  |
| 13  | GM4                                  | Gastric mucin 4919                  | PBS 0.01%T   | 0.5  |
| 14  | GM5                                  | Gastric mucin 5945                  | PBS 0.01%T   | 0.5  |
| 15  | GM6                                  | Gastric mucin 5975                  | PBS 0.01%T   | 0.5  |
| 16  | GM7                                  | Gastric mucin 5878                  | PBS 0.01%T   | 0.5  |
| 17  | GM8                                  | Gastric mucin 6077(2)               | PBS          | 0.5  |
| 18  | GM9                                  | Gastric mucin 6335                  | PBS 0.01%T   | 0.5  |
| 19  | GM10                                 | Gastric mucin 6894                  | PBS 0.025% T | 0.5  |
| 20  | GM11                                 | Gastric mucin 6077                  | PBS 0.01%T   | 0.5  |
| 21  | GM12                                 | Gastric mucin 4893                  | PBS 0.01%T   | 0.5  |
| 22  | PBS                                  |                                     | PBS          |      |
| 23  | E12_M11                              | E12                                 | PBS 0.025% T | 0.5  |
| 24  | LS174T_M72                           | LS174T 72 or 204                    | PBS 0.01% T  | 0.5  |
| 25  | Porcine stomach mucin M102           | Porcine stomach mucin               | PBS 0.025% T | 0.5  |
| 26  | Chicken proximal small intestine M71 | Chicken Proximal Small Intestine 34 | PBS          | 0.25 |
| 27  | Chicken large intestine mucin M41    | Chicken Large Intestine 41          | PBS 0.01% T  | 0.2  |
| 28  | Chicken cecum_M70                    | Chicken Cecum 70                    | PBS 0.01% T  | 0.5  |
| 29  | PBS_0.025%T                          |                                     | PBS 0.025% T |      |

**Supplementary Table S4.** Lectins used to characterise the glycosylation of gastric and colonic mucins, their binding specificity and the concentrations used (mg/mL).

| <b>Lectin</b>                             | <b>Abbreviation</b> | <b>Binding specificity</b>                                                                                                                                                                                             | <b>Concentration</b> |
|-------------------------------------------|---------------------|------------------------------------------------------------------------------------------------------------------------------------------------------------------------------------------------------------------------|----------------------|
| <i>Ulex europaeus</i> agglutinin I        | UEA-I               | Fuc- $\alpha$ -(1 $\rightarrow$ 2), H type 2 antigen                                                                                                                                                                   | 10                   |
| <i>Maackia amurensis</i> agglutinin       | MAA                 | Neu- $\alpha$ -(2 $\rightarrow$ 3)-GalNAc, Gal-3-SO <sub>4</sub> <sup>2-</sup> > Lac                                                                                                                                   | 10                   |
| <i>Griffonia simplicifolia</i> lectin-II  | GS-II               | Terminal non-reducing $\alpha$ - or $\beta$ -linked GlcNAc                                                                                                                                                             | 10                   |
| Peanut agglutinin                         | PNA                 | Gal (Gal- $\beta$ -(1 $\rightarrow$ 3)-GalNAc (T-antigen) > GalNAc > Lac > Gal, terminal $\beta$ -Gal)                                                                                                                 | 15                   |
| <i>Artocarpus integrifolia</i> agglutinin | AIA                 | Gal, Gal- $\beta$ -(1 $\rightarrow$ 3)-GalNAc (T-antigen), Gal- $\alpha$ -(1 $\rightarrow$ 6), sialylation independent.                                                                                                | 15                   |
| Soya bean agglutinin                      | SBA                 | GalNAc > Gal                                                                                                                                                                                                           | 15                   |
| <i>Wisteria floribunda</i> agglutinin     | WFA                 | GalNAc, GalNAc- $\alpha$ -(1 $\rightarrow$ 6)-Gal > GalNAc- $\alpha$ -(1 $\rightarrow$ 3)-GalNAc (Forsmann antigen) > GalNAc >> Lac > Gal, GlcA- $\alpha$ -(1 $\rightarrow$ 3)-GalNAc. Also binds chondroitin sulfate. | 10                   |
